# Supplementary material for: Smoothing and extraction of traits in the growth analysis of noninvasive phenotypic data
Source: PubMed Central journal article supplement (PMC7065360; doi:10.1186/s13007-020-00577-6), 2020-03-10
Supplement: 13007_2020_577_MOESM3_ESM.pdf [file 13007_2020_577_MOESM3_ESM.pdf]

# Smoothing and extraction of traits in the growth analysis of noninvasive phenotypic data

by C. Brien, N. Jewell, S.J. Watt-Williams, T. Garnett and B. Berger.

<https://dx.doi.org/10.1186/s13007-020-00577-6>

## Additional File 3: Supporting material for the longitudinal analyses

### Plots comparing predictions obtained with differing numbers of knots

The plots in Additional Figures [S1–S8](#) compare the smoothing achieved with 10, 15, 20, 35 knots for the PSA, backtransformed PSA (from the analysis of the  $\ln(\text{PSA})$ ), PSA AGR and PSA RGR (from the predicted  $\ln(\text{PSA})$ ).

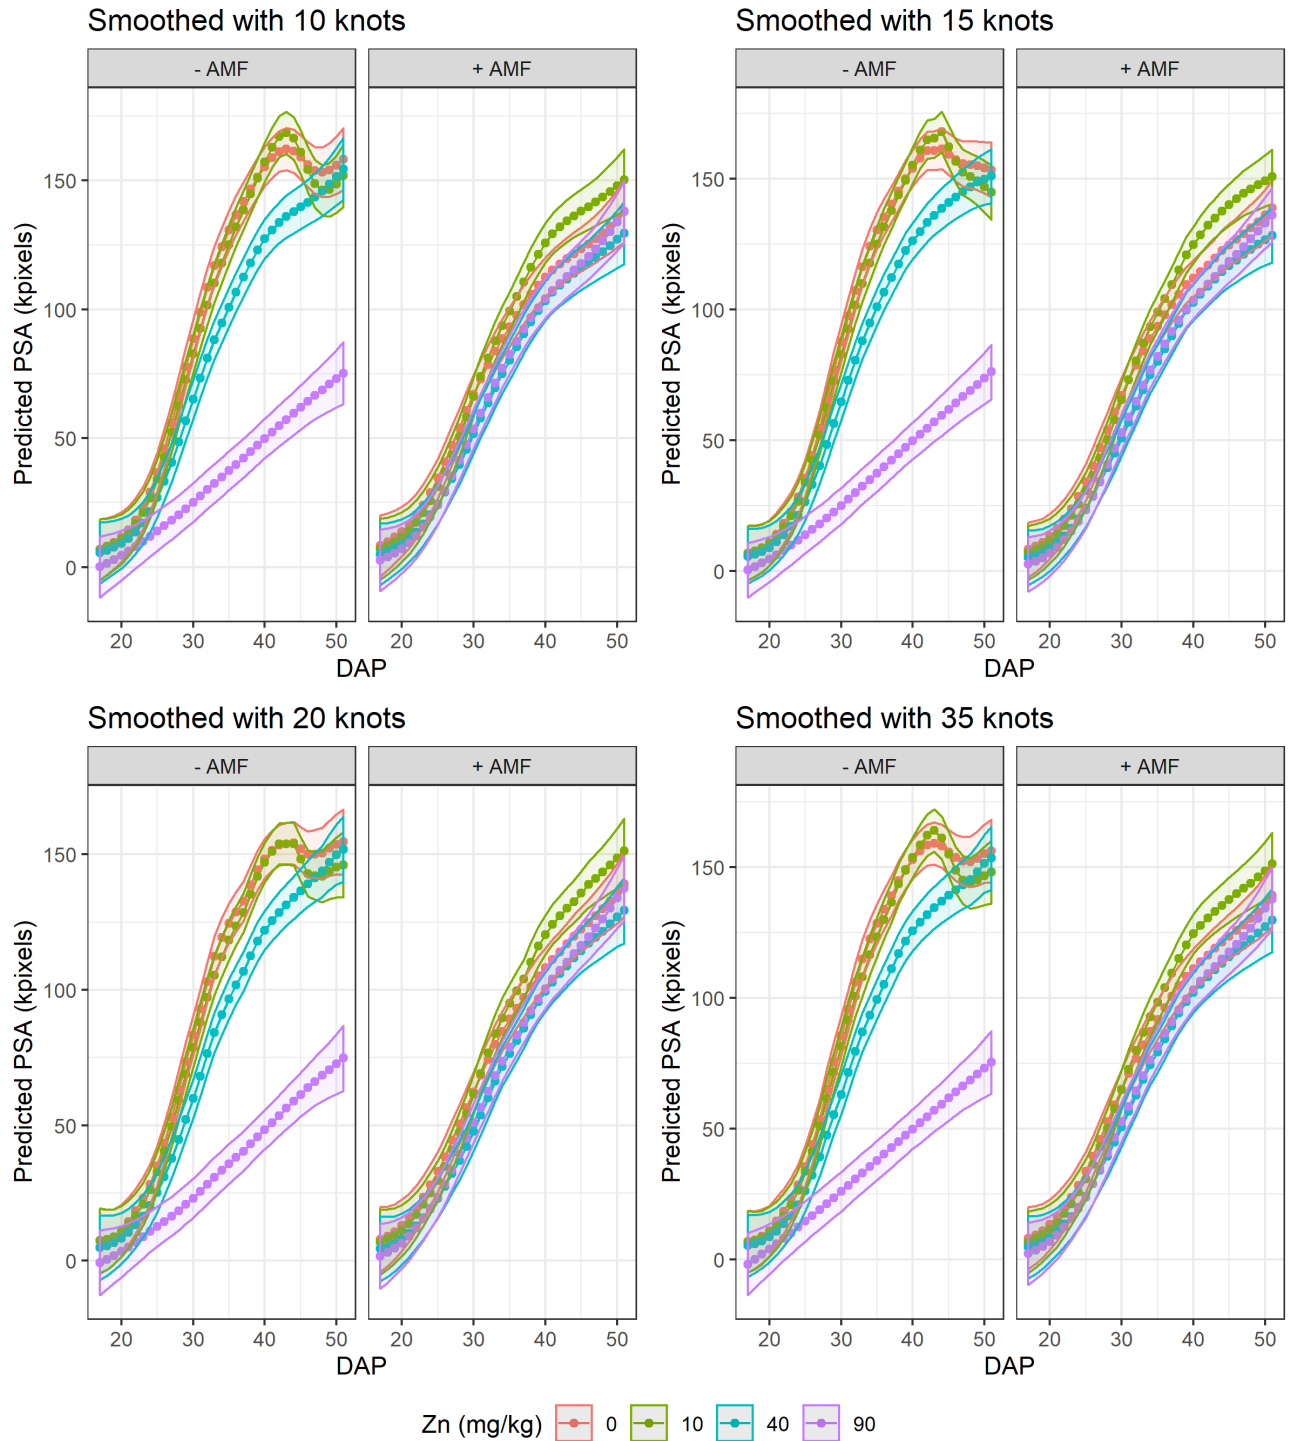

Figure S1: Plot of predicted PSA for combinations of Zn and AMF that compares the smoothing achieved with 10, 15, 20 and 35 knots. The error ribbons are the predicted values  $\pm 0.5$  LSD ( $\alpha = 0.05$ ). Separated ribbons indicate a significant difference, in contrast to overlapping ribbons for which there is not a significant difference.

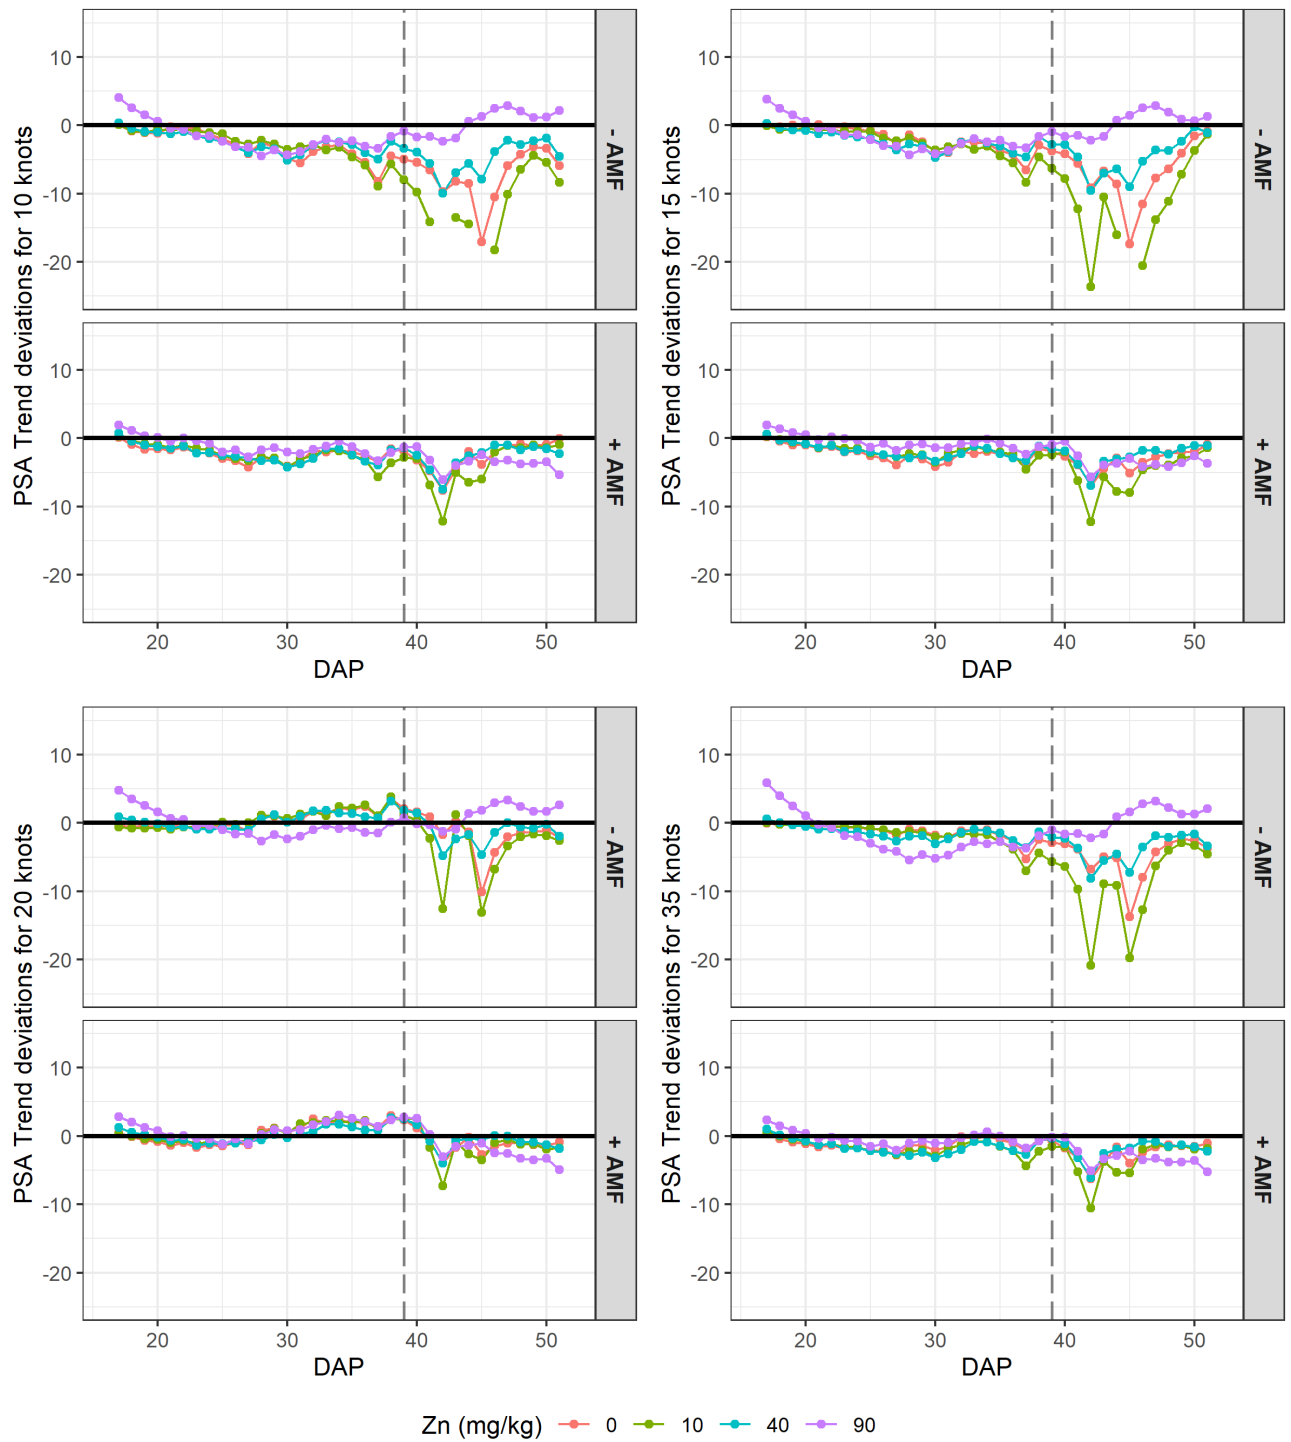

Figure S2: Plot of deviations between unsmoothed and smoothed predicted PSA for combinations of Zn and AMF that compares the smoothing achieved with 10, 15, 20 and 35 knots.

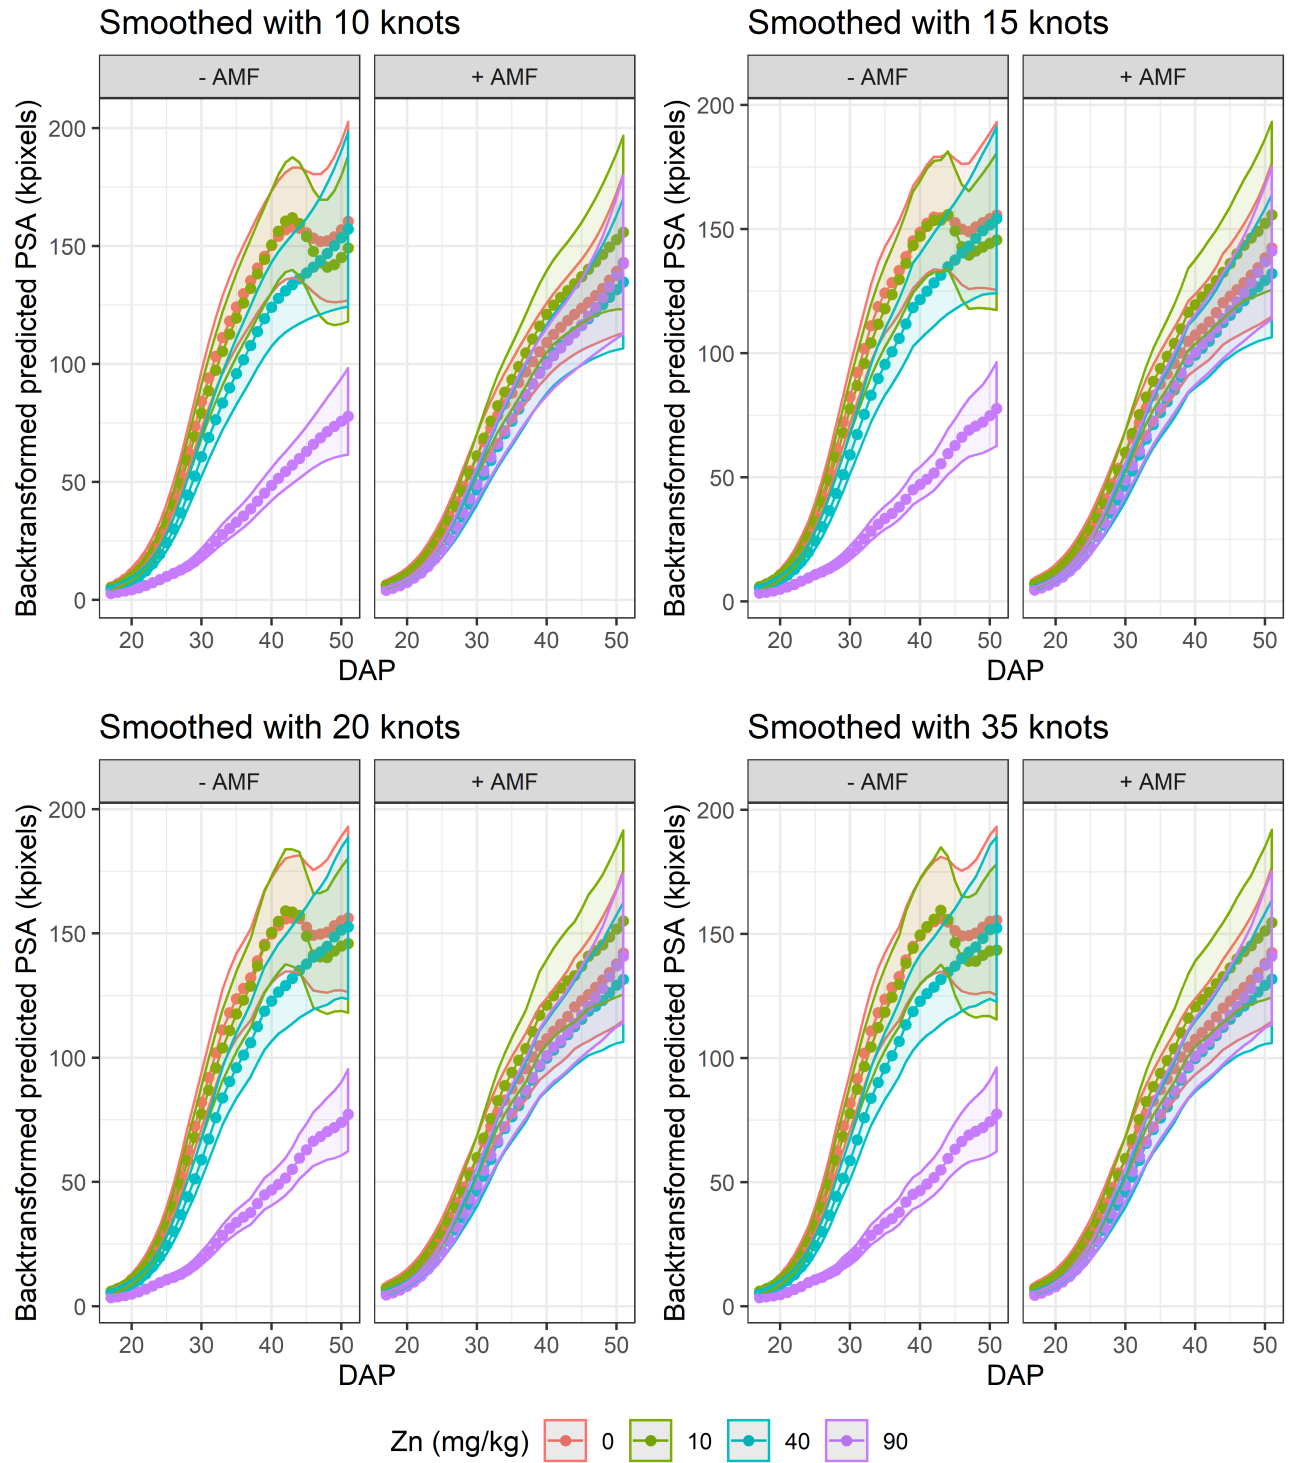

Figure S3: Plot of backtransformed predicted PSA for combinations of Zn and AMF that compares the smoothing achieved with 10, 15, 20 and 35 knots. The error ribbons are the predicted values  $\pm 0.5$  LSD ( $\alpha = 0.05$ ). Separated ribbons indicate a significant difference, in contrast to overlapping ribbons for which there is not a significant difference.

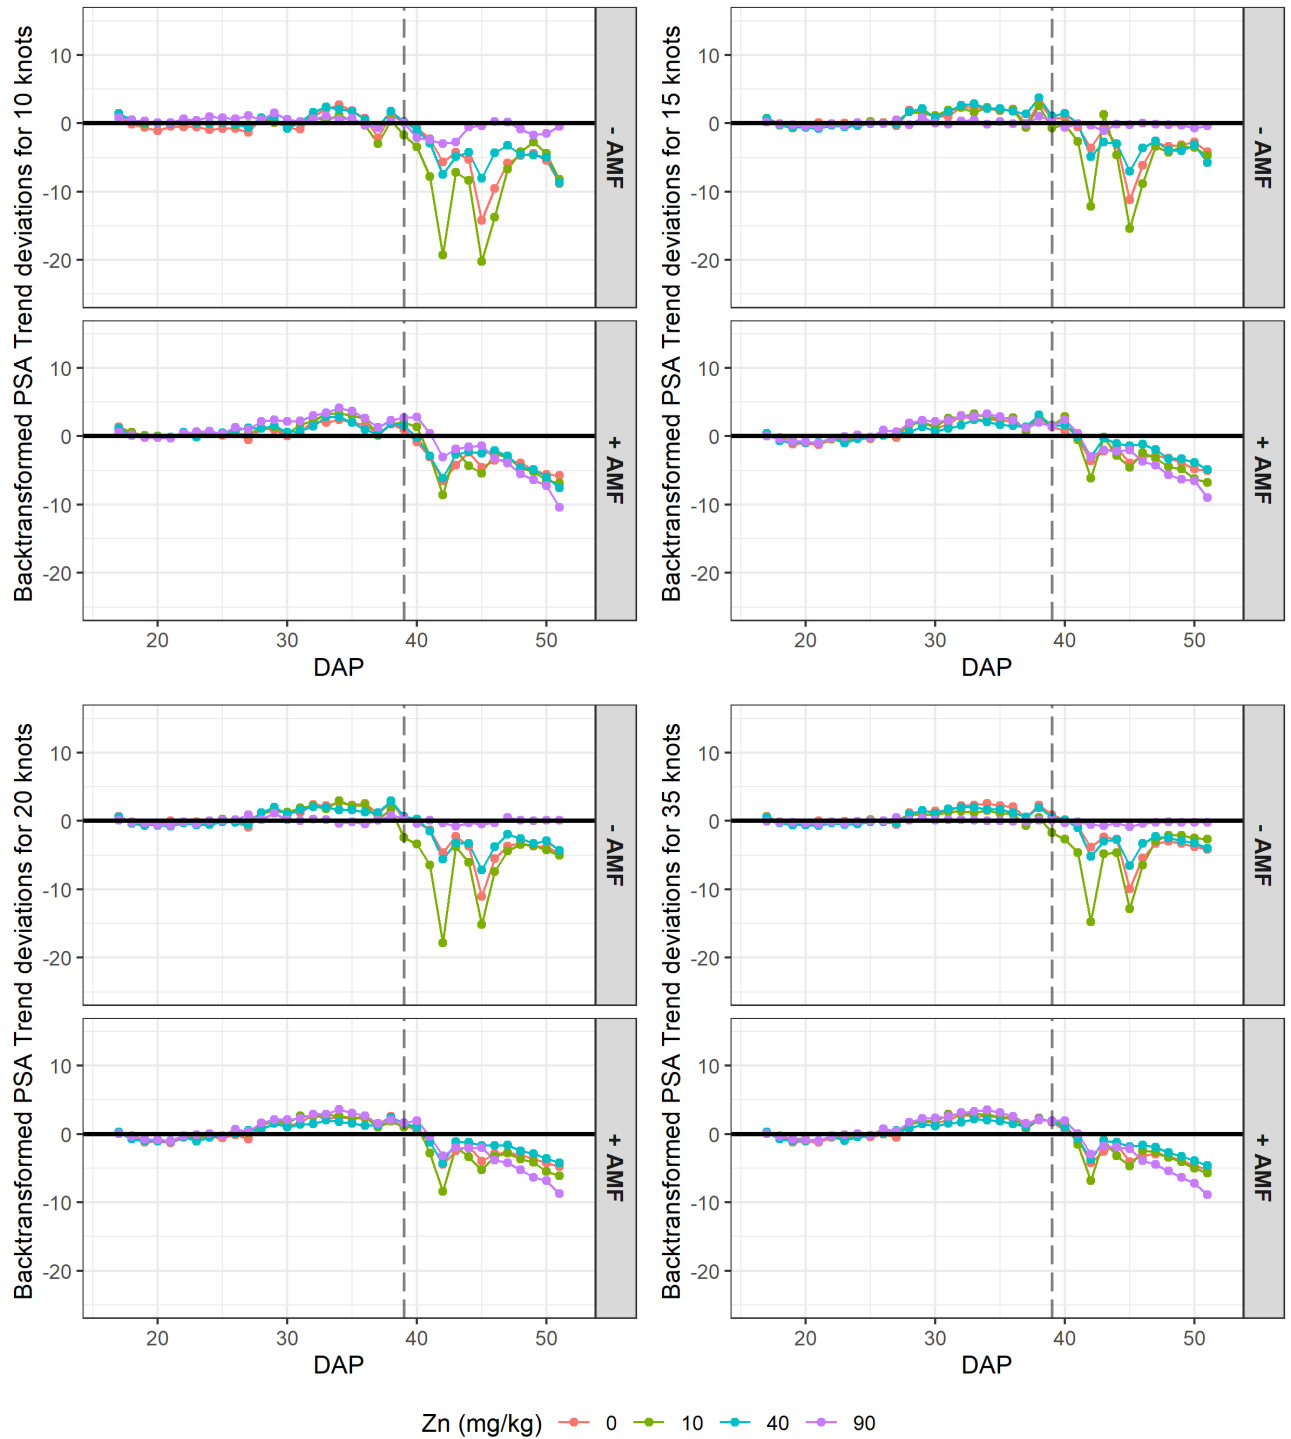

Figure S4: Plot of deviations between unsmoothed and smoothed backtransformed predicted PSA for combinations of Zn and AMF that compares the smoothing achieved with 10, 15, 20 and 35 knots.

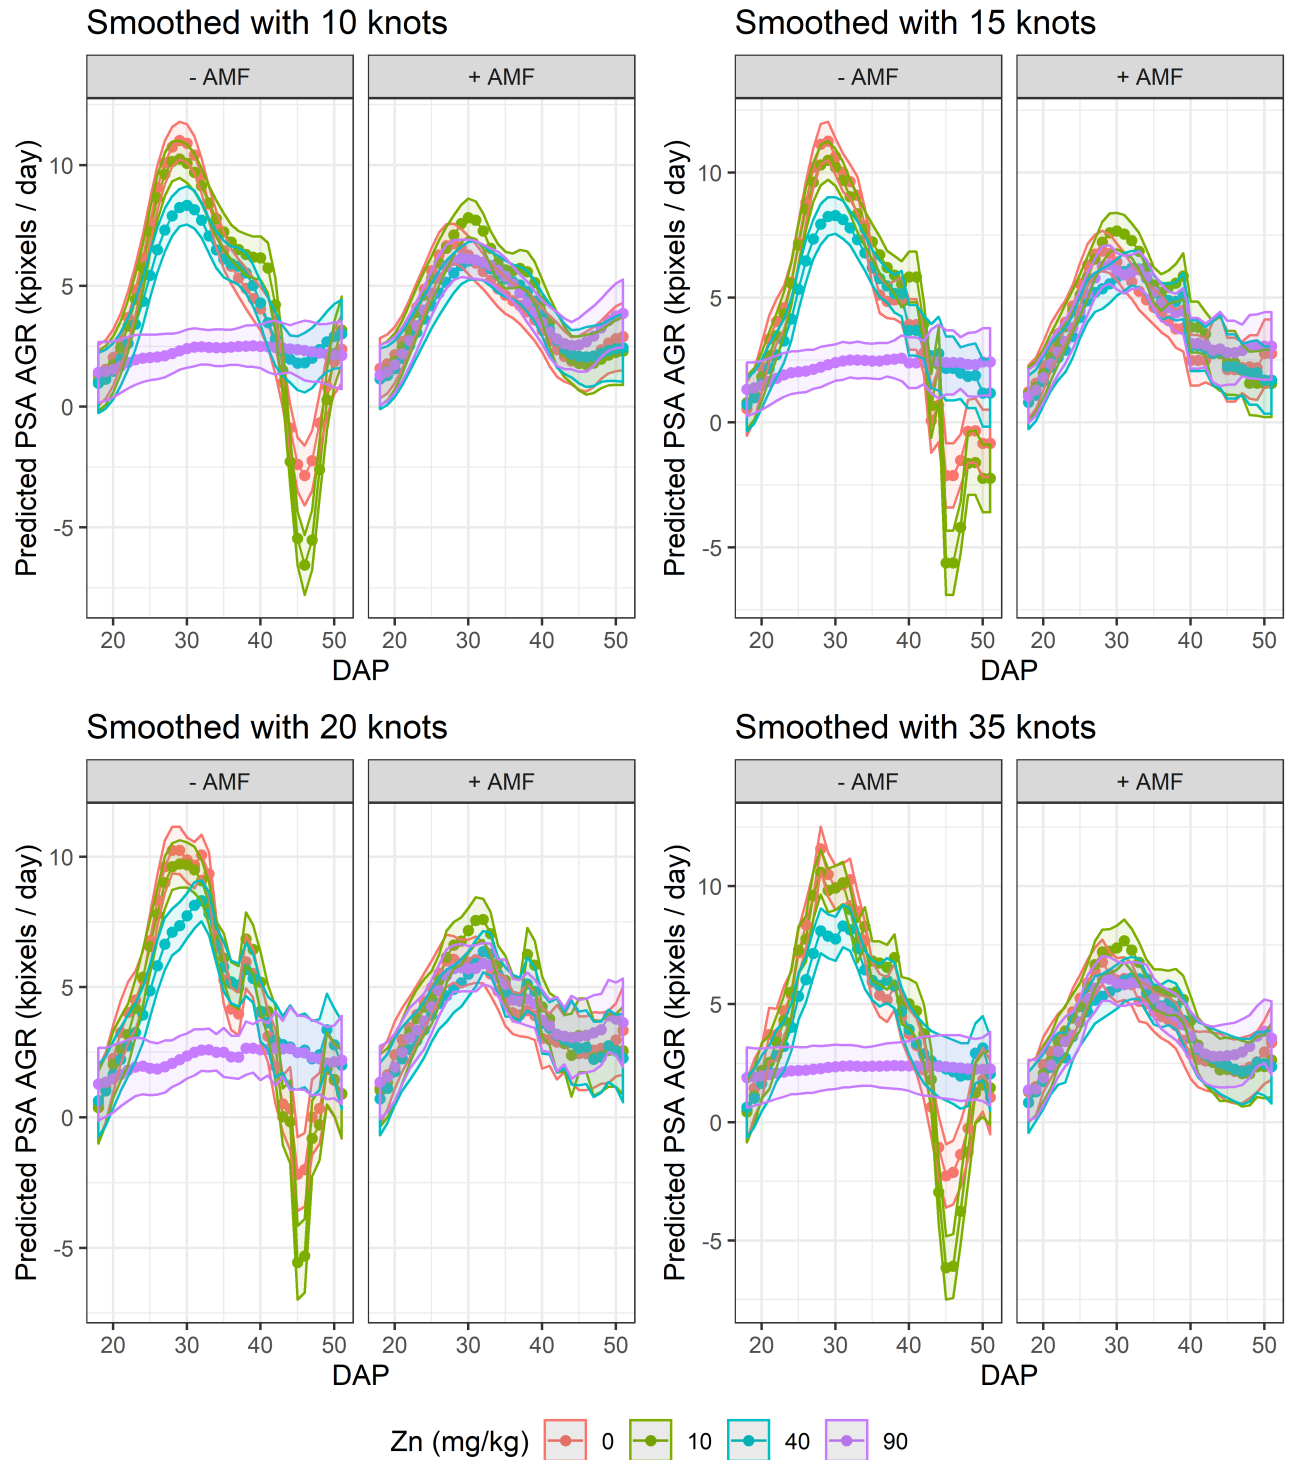

Figure S5: Plot of predicted PSA AGR for combinations of Zn and AMF that compares the smoothing achieved with 10, 15, 20 and 35 knots. The error ribbons are the predicted values  $\pm 0.5$  LSD ( $\alpha = 0.05$ ). Separated ribbons indicate a significant difference, in contrast to overlapping ribbons for which there is not a significant difference.

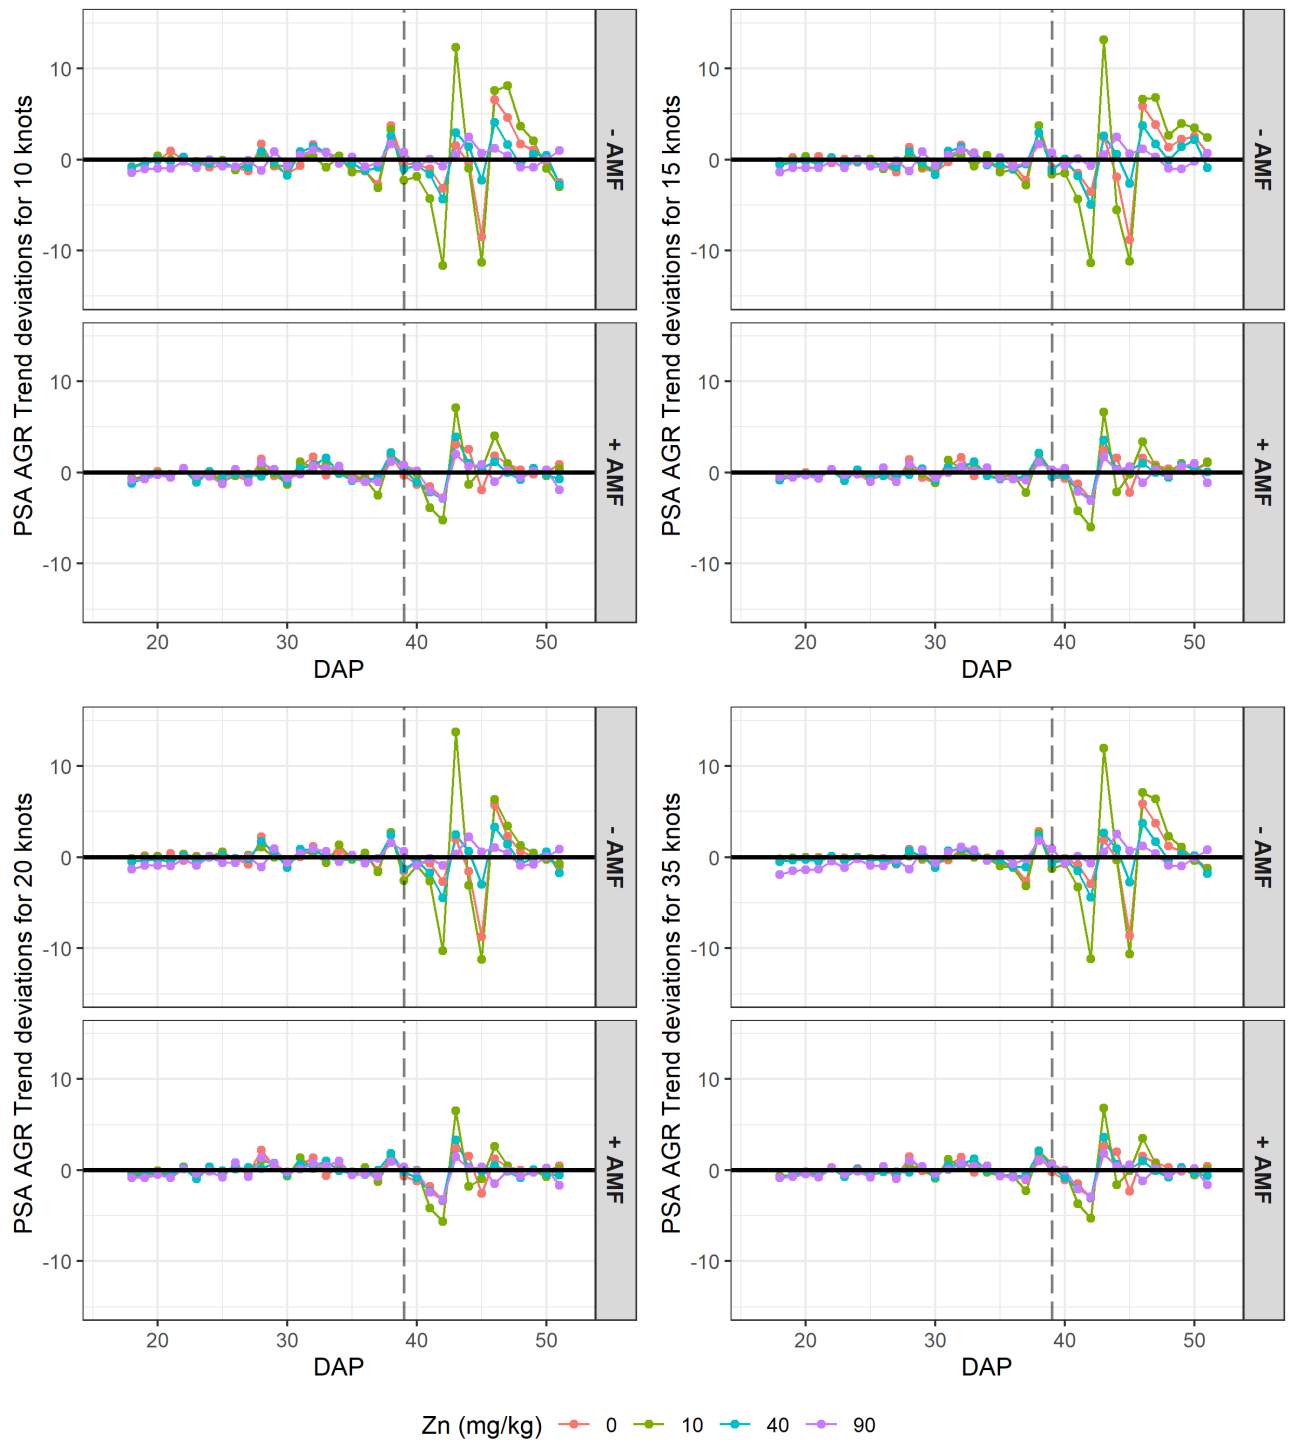

Figure S6: Plot of deviations between unsmoothed and smoothed predicted PSA AGR for combinations of Zn and AMF that compares the smoothing achieved with 10, 15, 20 and 35 knots.

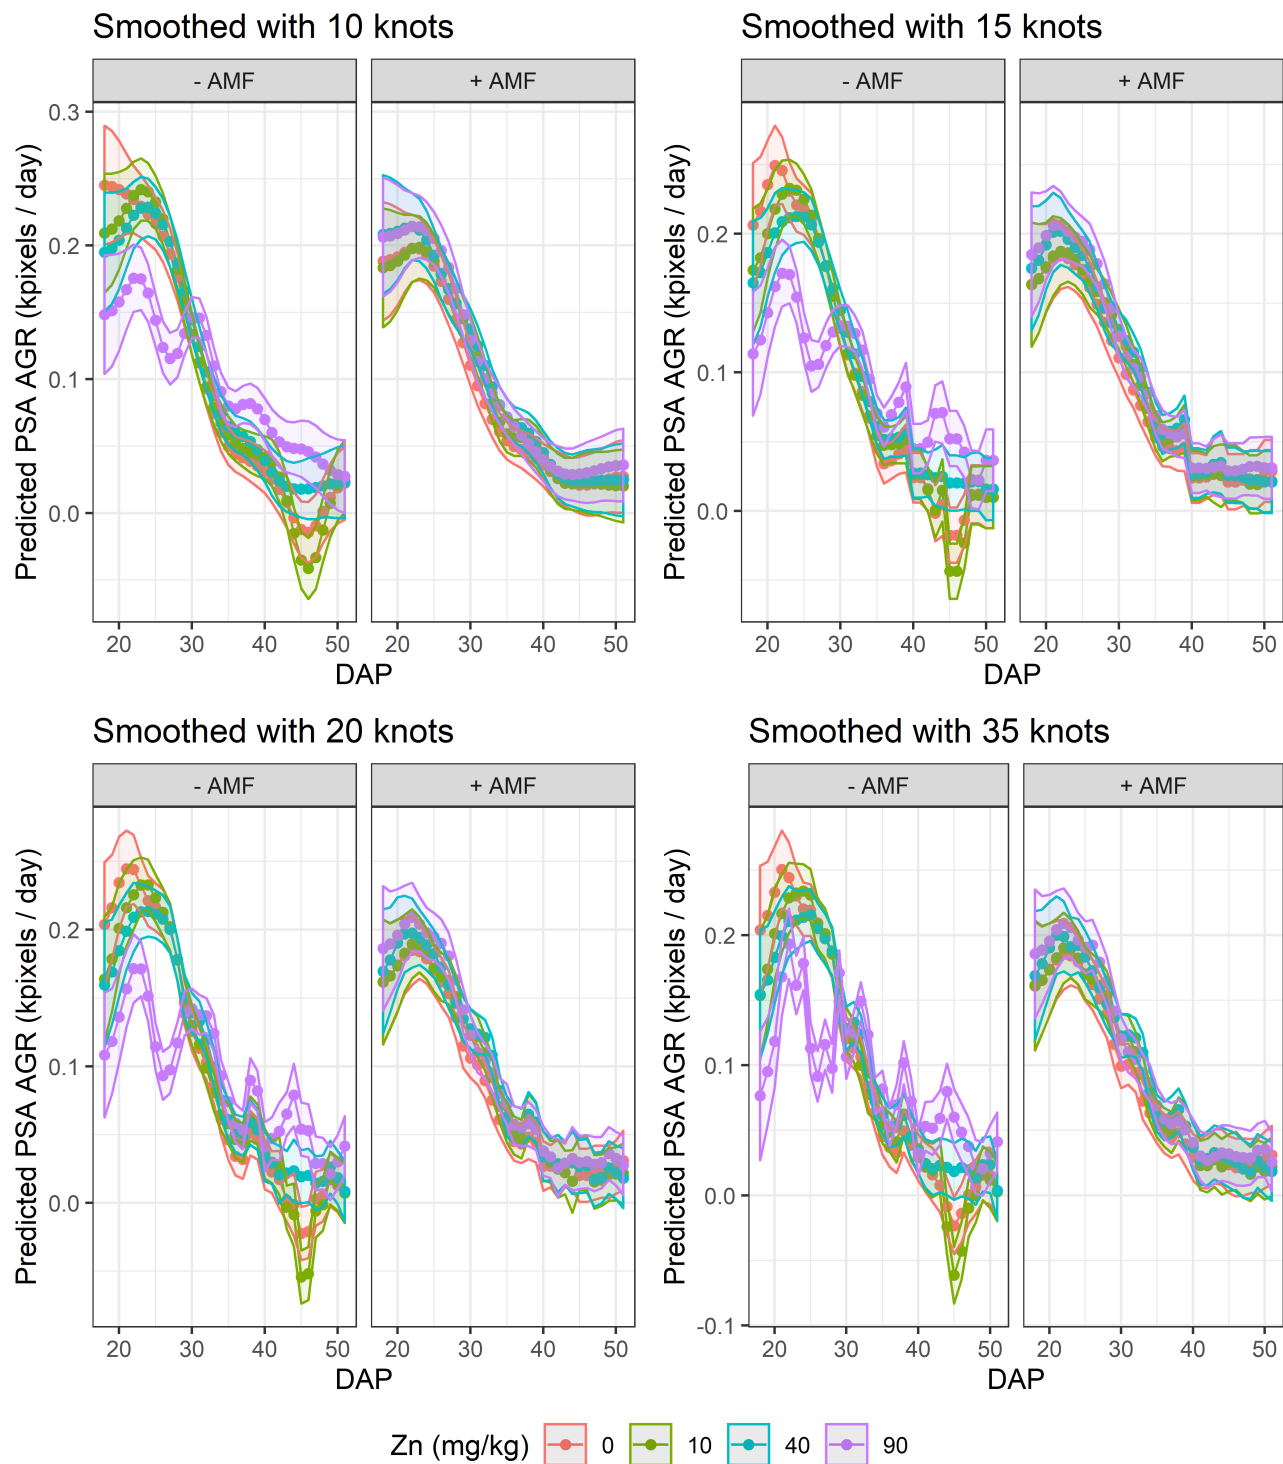

Figure S7: Plot of predicted PSA RGR for combinations of Zn and AMF that compares the smoothing achieved with 10, 15, 20 and 35 knots. The error ribbons are the predicted values  $\pm 0.5$  LSD ( $\alpha = 0.05$ ). Separated ribbons indicate a significant difference, in contrast to overlapping ribbons for which there is not a significant difference.



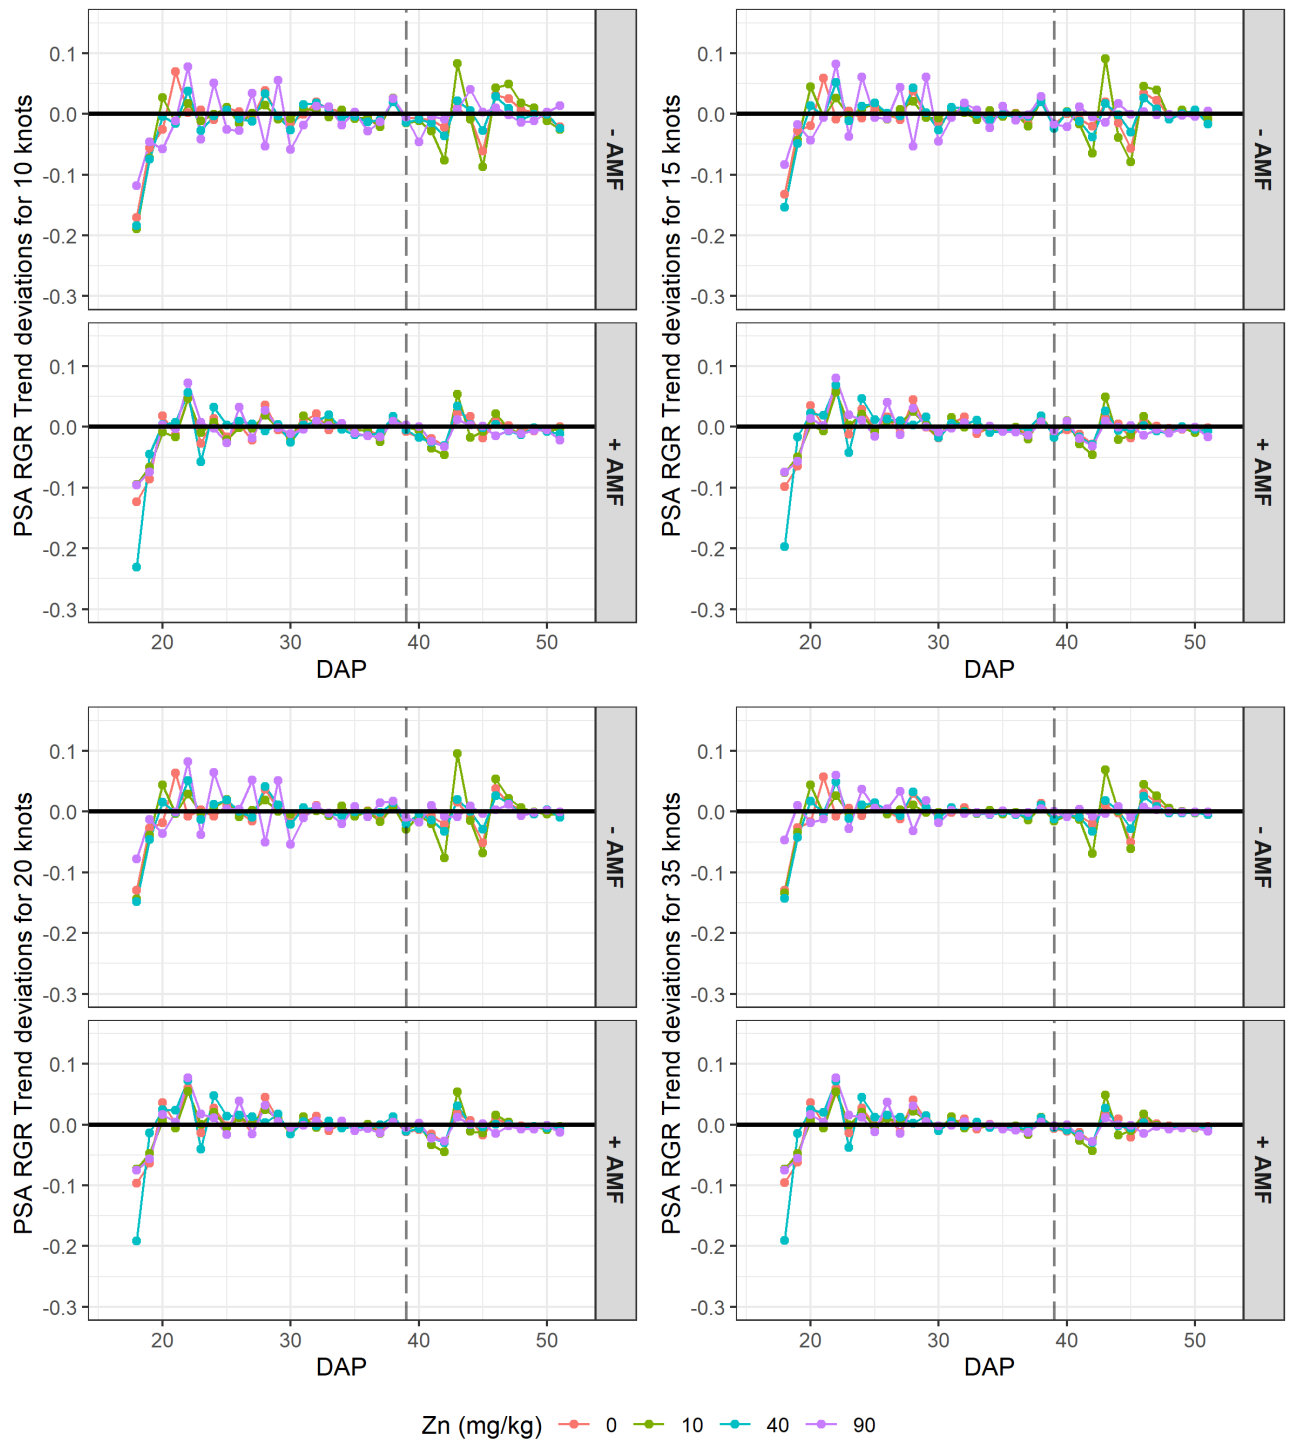

Figure S8: Plot of deviations between unsmoothed and smoothed predicted PSA RGR for combinations of Zn and AMF that compares the smoothing achieved with 10, 15, 20 and 35 knots.

## Summary of hypothesis testing for the full variance model

**Table S1: The  $p$ -values of the Wald F-statistics for PSA**

| Term            | DF | Denominator DF | Wald F  | p     |
|-----------------|----|----------------|---------|-------|
| (Intercept)     | 1  | 21.2           | 3027.00 | 0.000 |
| Block           | 3  | 20.0           | 4.47    | 0.015 |
| Treatments      | 7  | 21.2           | 25.03   | 0.000 |
| Treatments:xDAP | 8  | 23.8           | 229.40  | 0.000 |

**Table S2: The  $p$ -values of the tests for the variance model for PSA**

| Term/change                                        | DF | p     | Action |
|----------------------------------------------------|----|-------|--------|
| Remove bound intercept-slope covariance            |    |       |        |
| DAP heterogeneity                                  | 35 | 0.000 |        |
| DAP autocorrelation                                | 1  | 0.000 |        |
| Change to heterogeneous splines for Treatments:DAP |    |       |        |
| Add random deviations                              |    |       |        |
| Treatments:DAP                                     | 1  | 0.080 |        |
| Heterogeneous Treatment splines                    | 6  | 0.001 |        |

**Table S3: The  $p$ -values of the Wald F-statistics for  $\ln(\text{PSA})$**

| Term        | DF | Denominator DF | Wald F   | p     |
|-------------|----|----------------|----------|-------|
| (Intercept) | 1  | 21.8           | 16990.00 | 0.000 |
| Block       | 3  | 20.0           | 2.75     | 0.069 |
| AMF         | 1  | 20.2           | 1.40     | 0.250 |
| Zn          | 3  | 20.0           | 27.78    | 0.000 |
| xDAP        | 1  | 25.0           | 1995.00  | 0.000 |
| AMF:Zn      | 3  | 20.0           | 12.14    | 0.000 |
| AMF:xDAP    | 1  | 23.6           | 0.43     | 0.518 |
| Zn:xDAP     | 3  | 23.0           | 1.53     | 0.233 |
| AMF:Zn:xDAP | 3  | 23.0           | 0.26     | 0.854 |

## Summary of hypothesis testing for the reduced variance model

Comparison of Additional Tables S5 and S6 with Additional Tables S1 and S3 will reveal that the  $p$ -values differ between the reduced and full models.

**Table S4: The  $p$ -values of the tests for the variance model for  $\ln(\text{PSA})$** 

| Term/change                                        | DF | p     | Action |
|----------------------------------------------------|----|-------|--------|
| Intercept-slope covariance                         | 1  | 1.000 |        |
| DAP heterogeneity                                  | 38 | 0.000 |        |
| DAP autocorrelation                                | 1  | 0.000 |        |
| Change to heterogeneous splines for Treatments:DAP |    |       |        |
| Add random deviations                              |    |       |        |
| Treatments:DAP                                     | 1  | 0.108 |        |
| Heterogeneous Treatment splines                    | 6  | 0.990 |        |
| Heterogeneous AMF splines                          | 1  | 0.123 |        |
| Heterogeneous Zn splines                           | 3  | 0.866 |        |
| Change to AMF*ZN*xDAP splines                      |    |       |        |
| spl(xDAP, k = 10):Zn                               | 1  |       |        |
| spl(xDAP, k = 10):AMF                              | 1  |       |        |
| Add random deviations                              |    |       |        |
| AMF:DAP:Zn                                         | 1  |       |        |
| AMF:Zn:DAP                                         |    |       |        |
| spl(xDAP, k = 10):AMF:Zn                           | 1  | 0.002 |        |

**Table S5: The  $p$ -values of the Wald F-statistics for PSA**

| Term            | DF | Denominator DF | Wald F  | p     |
|-----------------|----|----------------|---------|-------|
| (Intercept)     | 1  | 20.3           | 2557.00 | 0.000 |
| Block           | 3  | 20.0           | 3.47    | 0.035 |
| Treatments      | 7  | 20.3           | 21.62   | 0.000 |
| Treatments:xDAP | 8  | 23.3           | 204.40  | 0.000 |

**Table S6: The  $p$ -values of the Wald F-statistics for  $\ln(\text{PSA})$** 

| Term        | DF | Denominator DF | Wald F   | p     |
|-------------|----|----------------|----------|-------|
| (Intercept) | 1  | 21.5           | 18250.00 | 0.000 |
| Block       | 3  | 20.0           | 2.92     | 0.059 |
| AMF         | 1  | 20.8           | 1.53     | 0.229 |
| Zn          | 3  | 20.3           | 30.07    | 0.000 |
| xDAP        | 1  | 27.1           | 1903.00  | 0.000 |
| AMF:Zn      | 3  | 20.3           | 12.99    | 0.000 |
| AMF:xDAP    | 1  | 24.6           | 0.46     | 0.502 |
| Zn:xDAP     | 3  | 23.6           | 1.88     | 0.161 |
| AMF:Zn:xDAP | 3  | 23.6           | 0.08     | 0.969 |

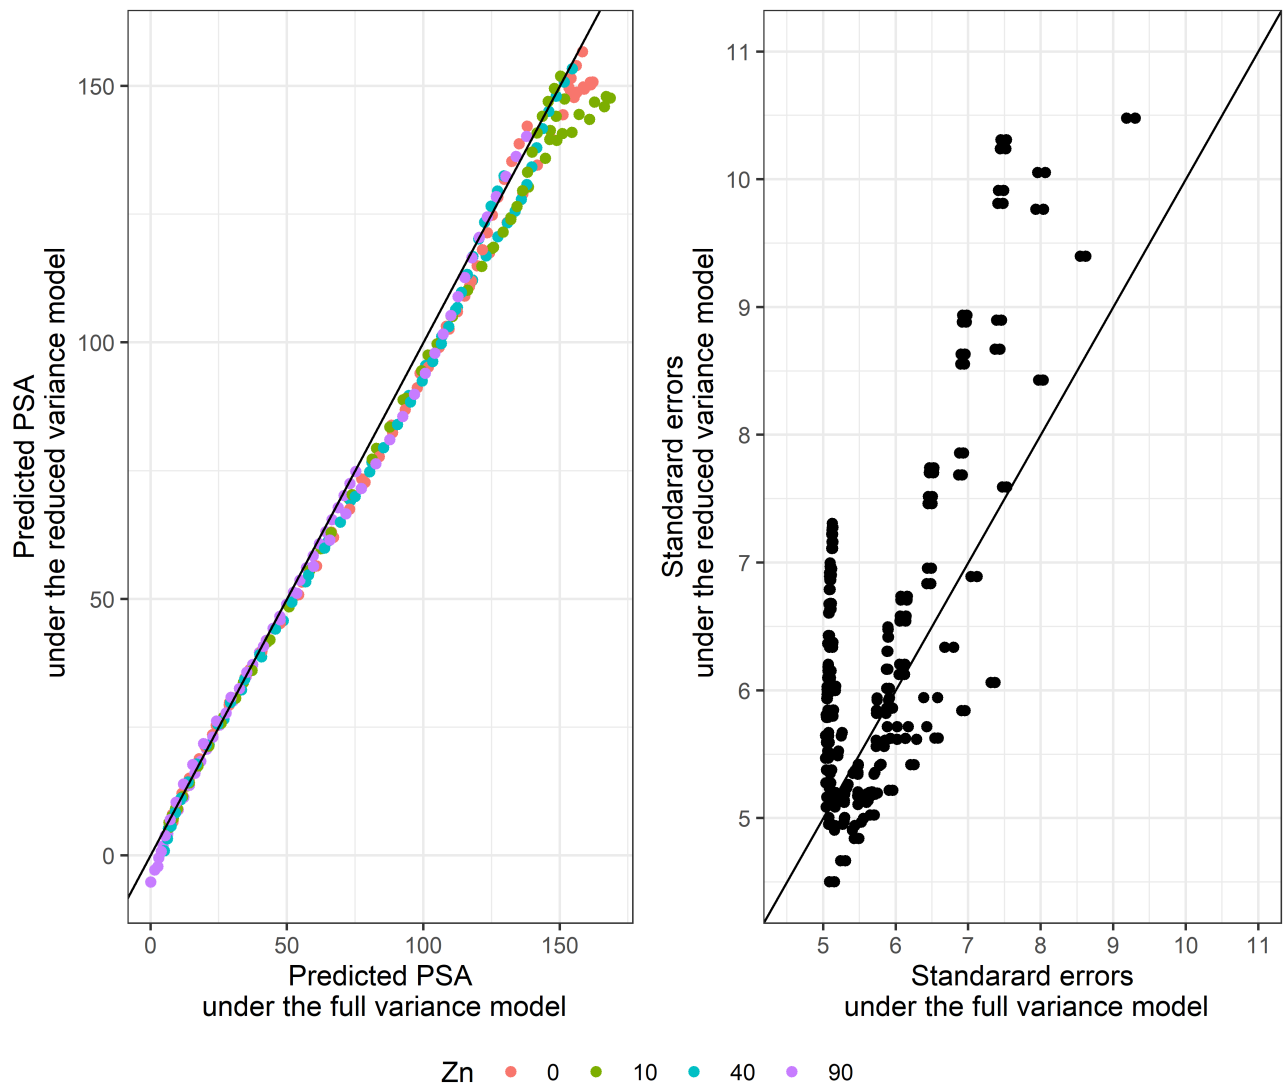

Figure S9: Comparison of predictions and standard errors under full and reduced models for PSA.

## Plots comparing predictions and standard errors under full and reduced models for PSA

Additional Figure S9 shows the predicted values for and their standard errors for two variance models: (i) a full model with unequal variances and first-order autocorrelations between times (x-axis), and (ii) a reduced model with equal variances and no correlation between times (y-axis). Clearly the models lead to different predictions and standard errors. Indeed the full model generally has lower standard errors.

## Residual-versus-fitted-values, residual boxplots and normal probability plots of the residuals

The plots in Figures [S10–S15](#) are based on the standardized conditional residuals from the analyses that investigate the effect of Zn and AMF on the trend over the DAPs (Stage 4). For the residual-versus-fitted-values plots, the expected pattern is one of a similar vertical distribution of points across all values plotted on the x-axis. Points outside the maroon lines are potential outliers. For normal probability plots, it can be concluded that the data are consistent with being normally distributed if all points lie within the envelopes included in the plot.

```
Spline: design points closer than 0.0034 have been merged.  
Spline: design points closer than 0.0034 have been merged.  
Spline: design points closer than 0.0034 have been merged.  
Spline: design points closer than 0.0034 have been merged.
```

Residuals vs fits: PSA with 10 knots

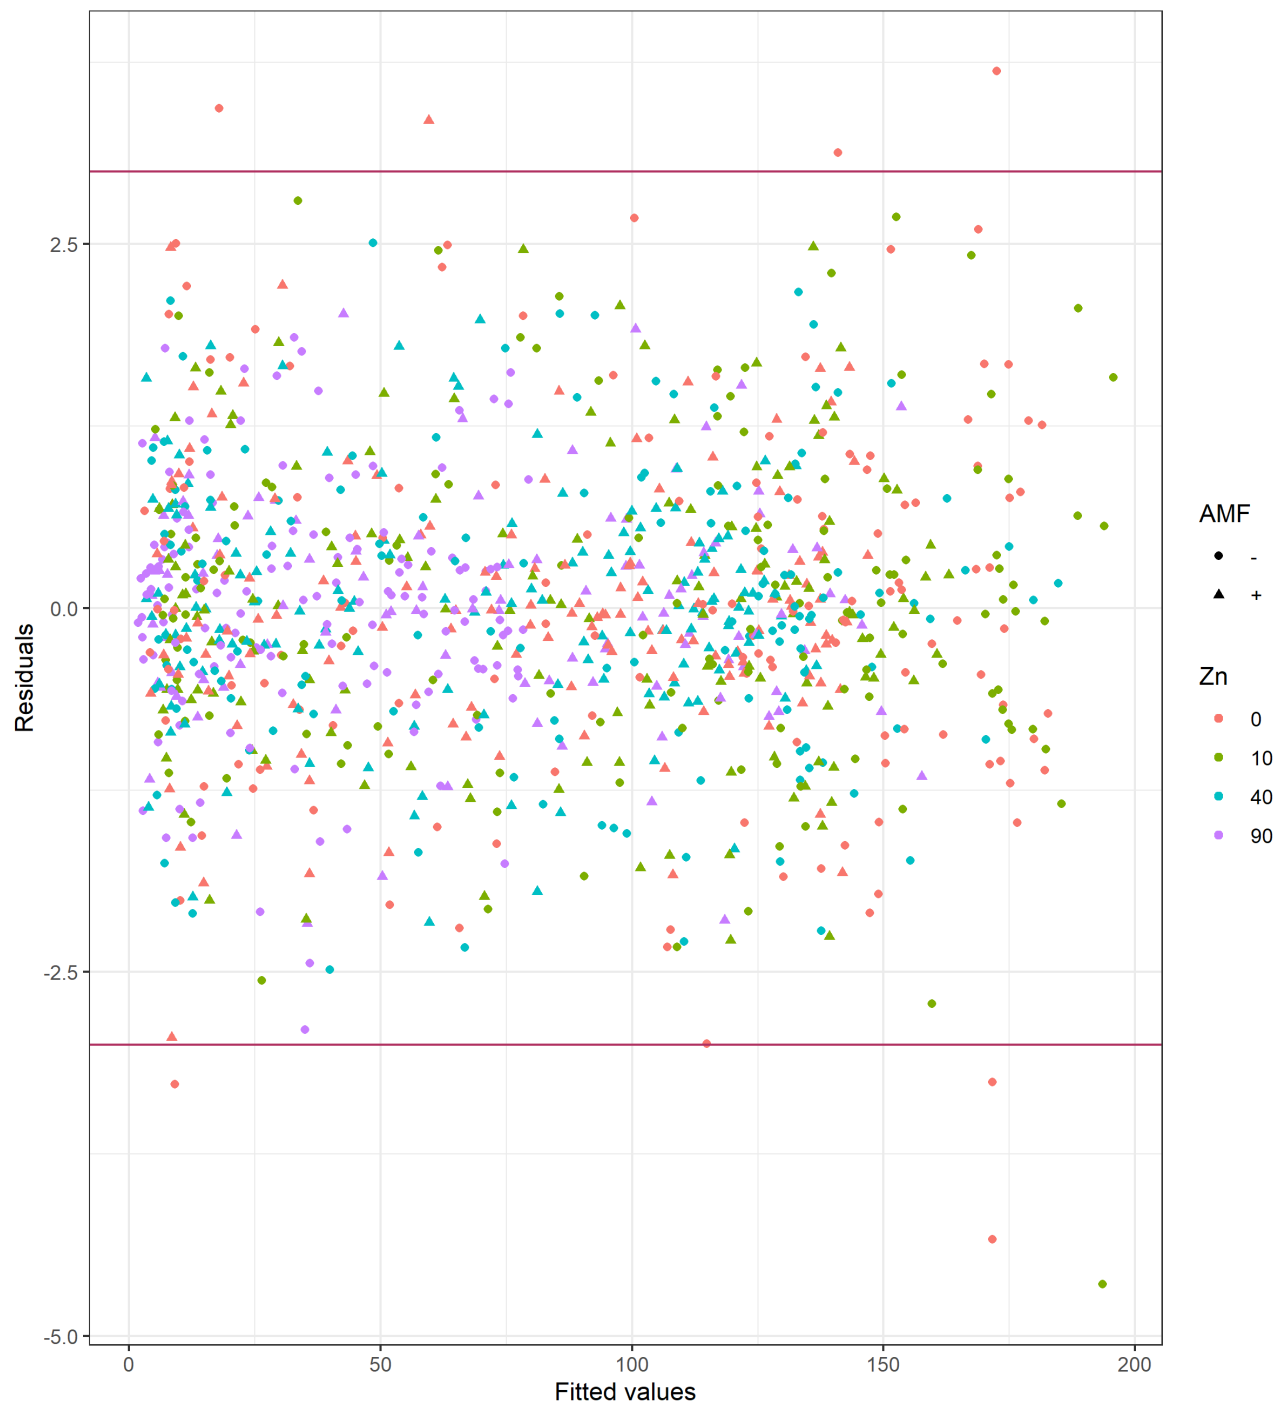

Figure S10: Residual plots for a trait.

Residuals over DAPs: PSA with 10 knots

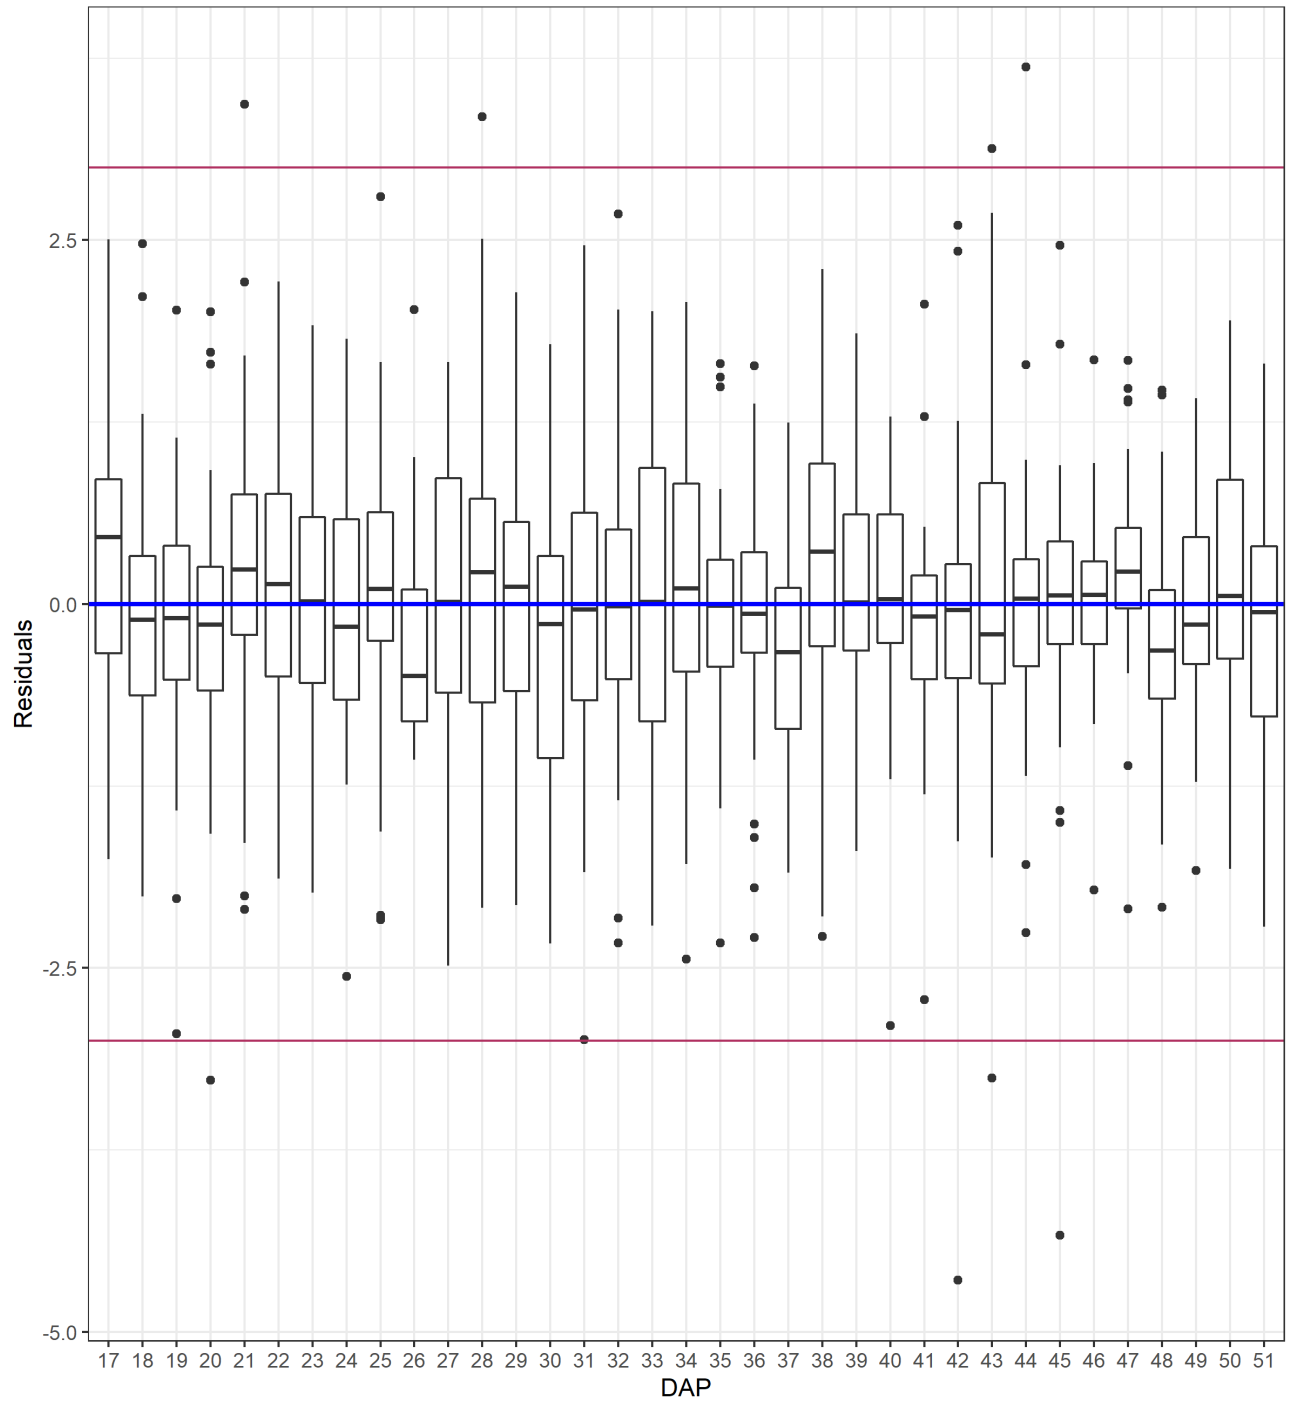

Figure S11: Residual plots for a trait.

Normal probability plot: PSA with 10 knots

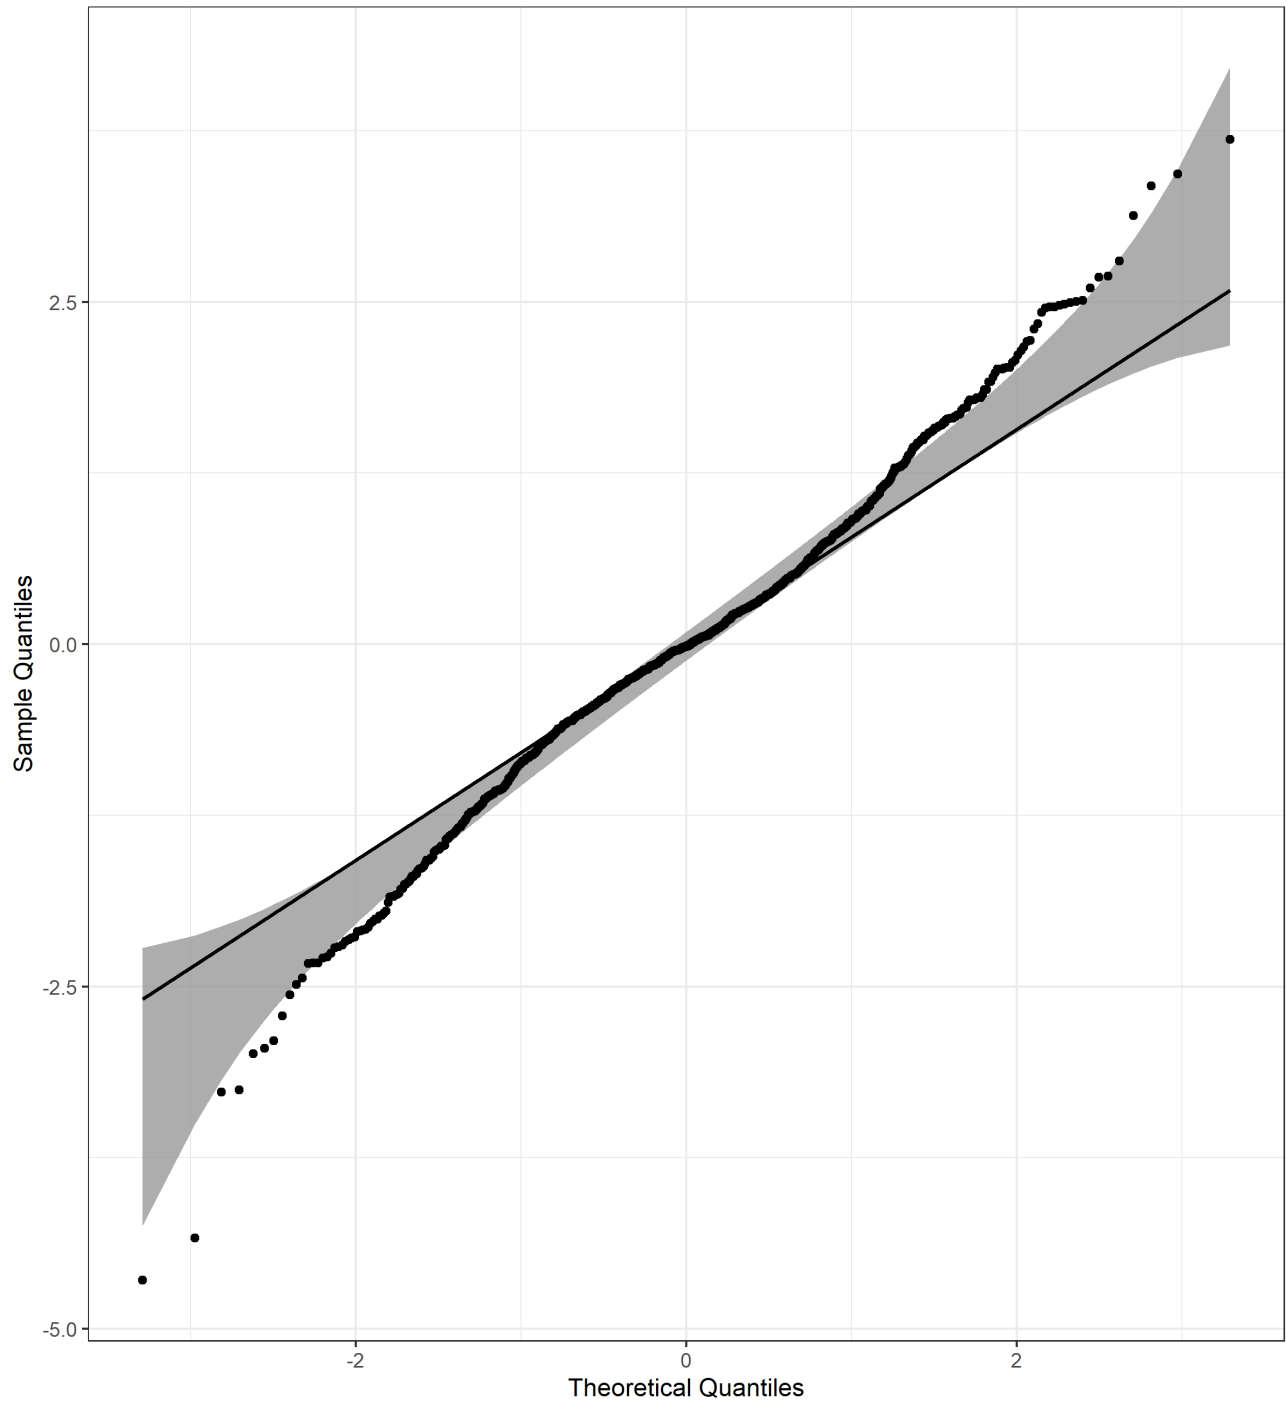

Figure S12: Residual plots for a trait.



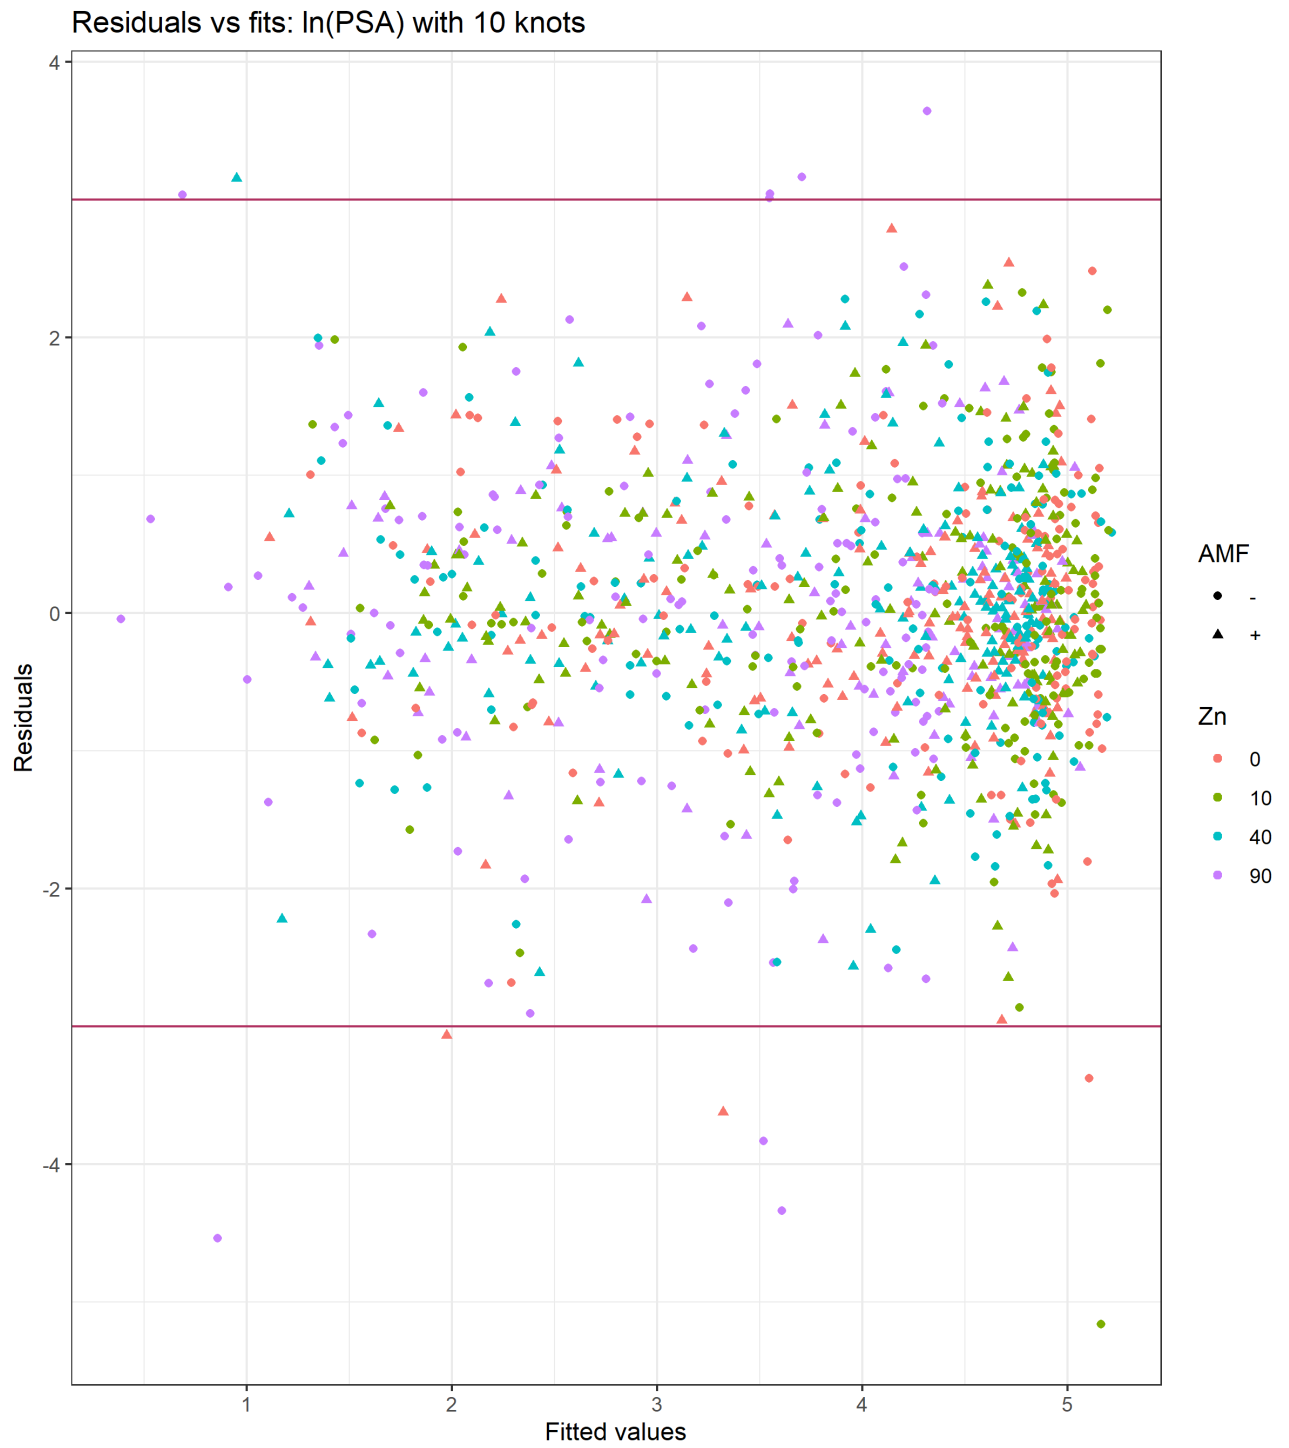

Figure S13: Residual plots for a trait.

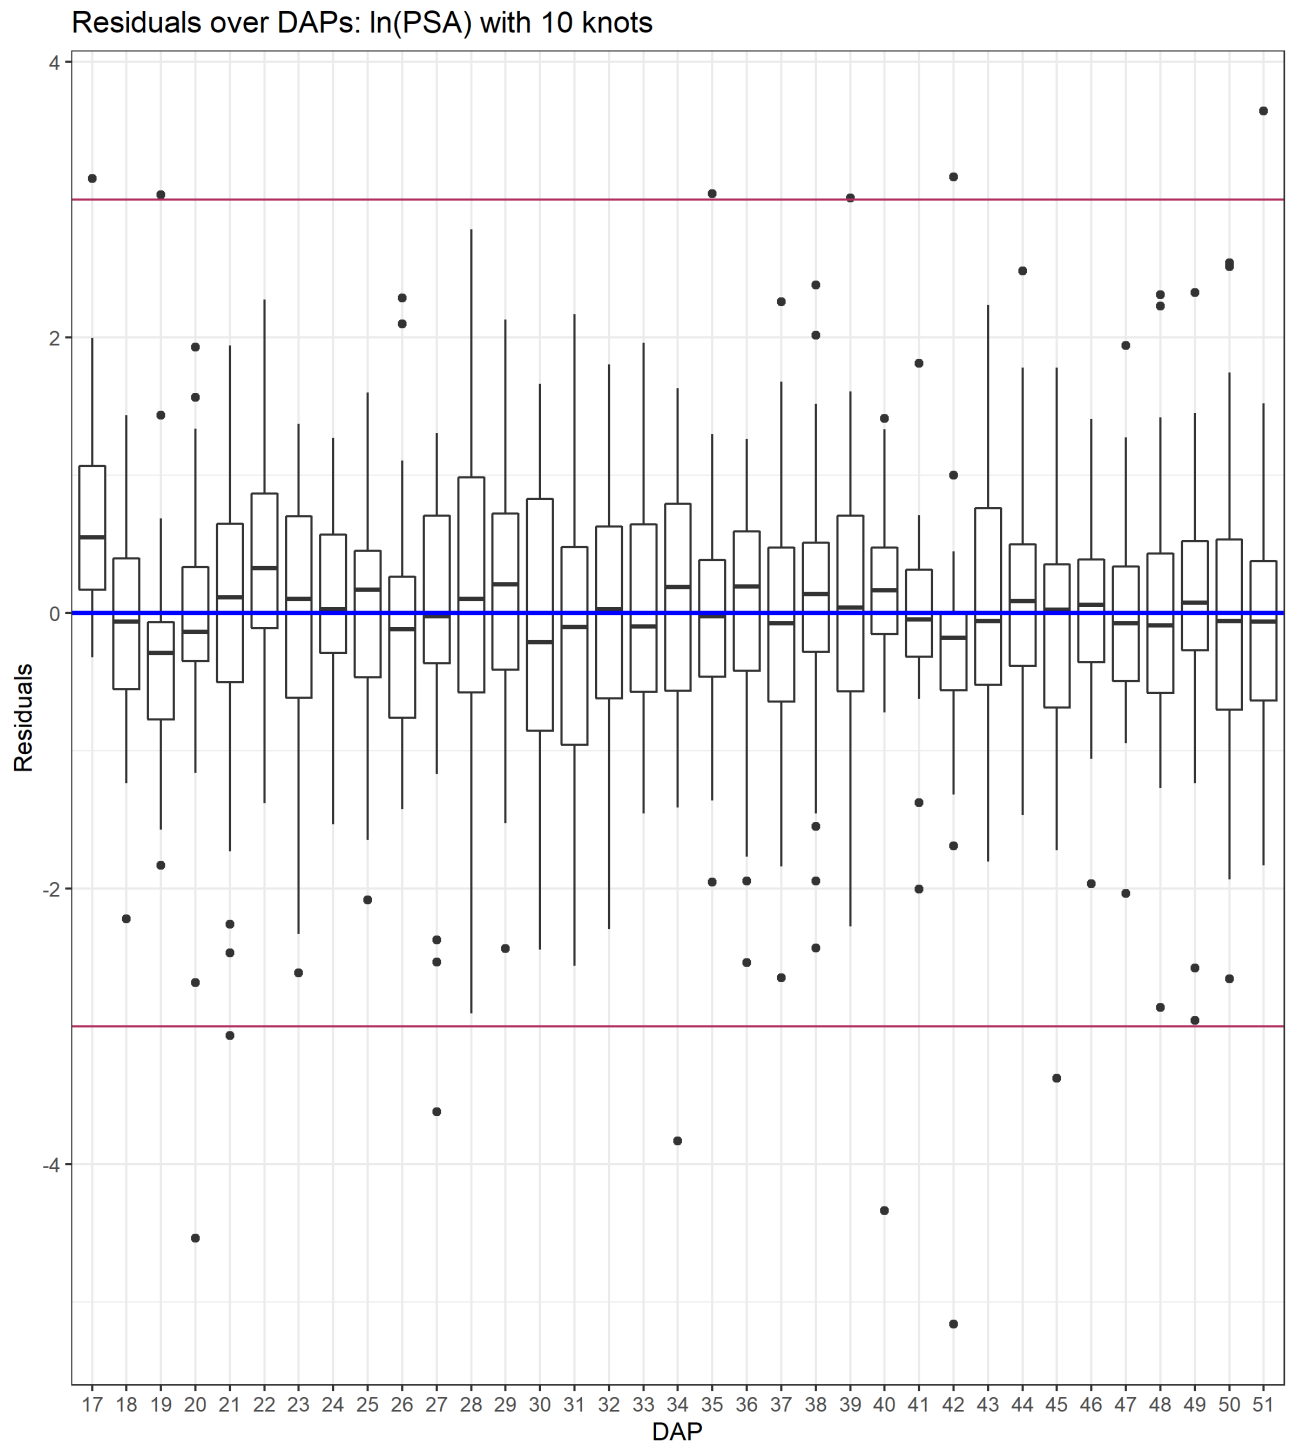

Figure S14: Residual plots for a trait.

Normal probability plot: ln(PSA) with 10 knots

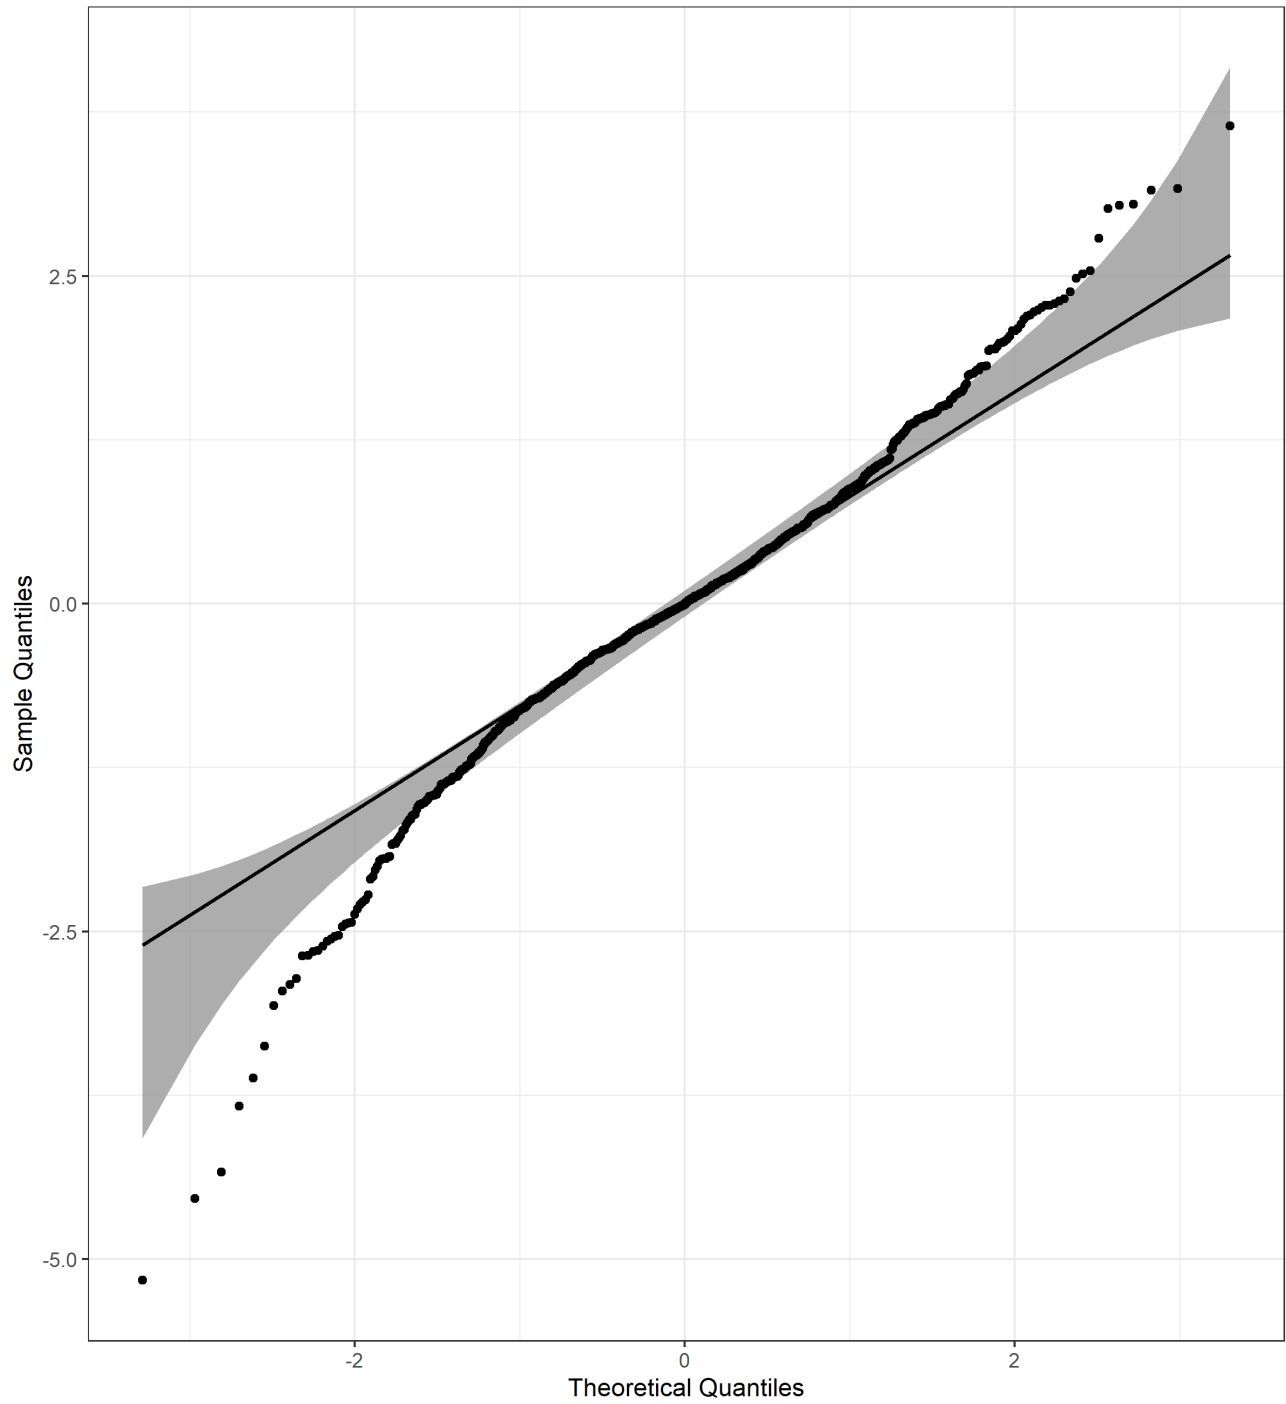

Figure S15: Residual plots for a trait.
